# Supplementary material
Source: publisher site journal article supplement (https://www.dovepress.com/article/302662)
Supplement: Supplementary file 1 [file get_supplementary_file.php]

# **Supplementary appendix**

**Supplement to 'revision bronchoscopy after endobronchial valve treatment for emphysema: indications, findings and outcomes'**

Sharyn A. Roodenburg, Karin Klooster, Jorine E. Hartman, T. David Koster, Marlies van Dijk, Dirk-Jan Slebos

## Table of contents

|                  |                                                                                           |               |
|------------------|-------------------------------------------------------------------------------------------|---------------|
| <b>Figure E1</b> | CT-scan images of patient treated with EBVs experiencing loss of initial treatment effect | <b>Page 3</b> |
| <b>Table E1</b>  | Revision bronchoscopy diagnosis with the corresponding bronchoscopic intervention         | <b>Page 4</b> |
| <b>Table E2</b>  | Results of bronchial wash aspirate cultures prior to valve implantation                   | <b>Page 5</b> |
| <b>Table E3</b>  | New bacterial growth after valve implantation                                             | <b>Page 6</b> |

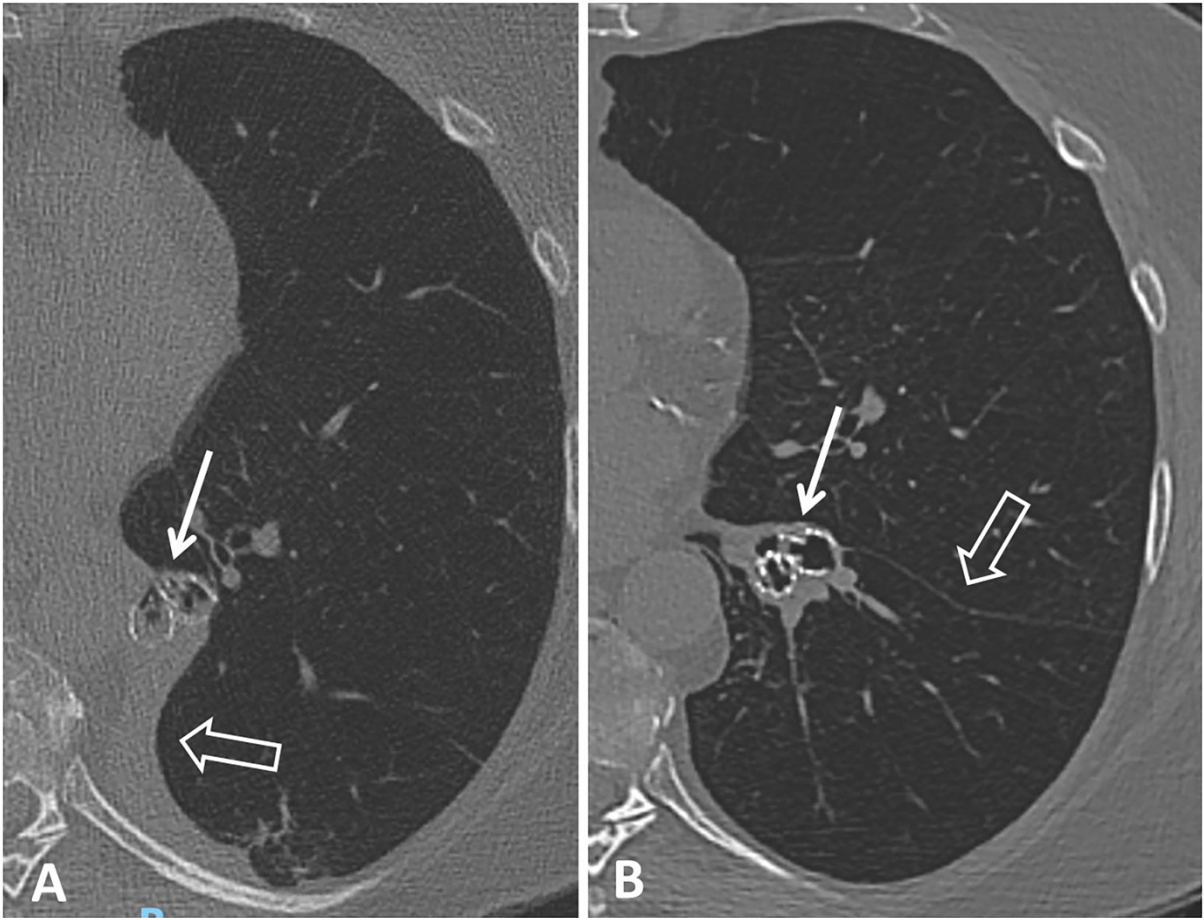

**Figure E1** CT-scan images of patient treated with EBVs (solid arrow) experiencing loss of initial treatment effect. **A.** Showing complete atelectasis of treated lobe (open arrow). **B.** Showing loss of atelectasis (open arrow).

**Table E1** Revision bronchoscopy diagnosis with the corresponding bronchoscopic intervention

|                             |                                   | Intervention    |                            |                             |                             |                             |                   |
|-----------------------------|-----------------------------------|-----------------|----------------------------|-----------------------------|-----------------------------|-----------------------------|-------------------|
|                             |                                   | No intervention | Cleaning of airways/valves | Placement of extra valve(s) | Temporary removal of valves | Permanent removal of valves | Valve replacement |
| <b>Endoscopic diagnosis</b> | Granulation tissue                | 1               | 3                          | 1                           | 5                           | 9                           | 20                |
|                             | Clinically significant secretions | -               | 2                          | -                           | 2                           | -                           | 4                 |
|                             | Valve migration                   | -               | -                          | 1                           | -                           | -                           | 4                 |
|                             | Possible collateral ventilation   | -               | -                          | 2                           | -                           | 2                           | 1                 |
|                             | Missing valve                     | -               | -                          | -                           | -                           | -                           | 4                 |
|                             | Valve size mismatch               | -               | -                          | 1                           | -                           | -                           | 3                 |
|                             | No abnormality                    | -               | 1                          | -                           | -                           | 2                           | 1                 |
|                             | Untreated subsegment              | -               | -                          | 2                           | -                           | -                           | 1                 |
|                             | Airway kinking                    | 2               | -                          | -                           | -                           | -                           | -                 |
| <i>Total</i>                | 3 (4%)                            | 6 (8%)          | 7 (10%)                    | 7 (10%)                     | 13 (18%)                    | 38 (51%)                    |                   |

**Table E2** Results of bronchial wash aspirate cultures prior to valve implantation

|                                                                        | Total (n=179) (%) | No granulation tissue (n=140) (%) | Granulation tissue (n=39) (%) |
|------------------------------------------------------------------------|-------------------|-----------------------------------|-------------------------------|
| <b>Total number of samples</b>                                         | <b>175 (98%)</b>  | <b>136 (97%)</b>                  | <b>39 (100%)</b>              |
| <b>Total number of positive samples for bacteria</b>                   | <b>48 (27%)</b>   | <b>36 (26%)</b>                   | <b>12 (31%)</b>               |
| <b>Total number of positive samples for <i>Aspergillus</i> species</b> | <b>25 (14%)</b>   | <b>18 (13%)</b>                   | <b>7 (18%)</b>                |
| <b>Gram-positive bacteria</b>                                          |                   |                                   |                               |
| <i>Beta-hemolytic streptococcus group C</i>                            | 1 (0.6%)          | 1 (0.7%)                          | 0 (0%)                        |
| <i>Corynebacterium pseudodiphtheriticum</i>                            | 2 (1.1%)          | 2 (1.5%)                          | 0 (0%)                        |
| <i>Staphylococcus aureus</i>                                           | 4 (2.3%)          | 2 (1.5%)                          | 2 (5.1%)                      |
| <i>Staphylococcus epidermidis</i>                                      | 1 (0.6%)          | 1 (0.7%)                          | 0 (0%)                        |
| <i>Streptococcus mitis</i>                                             | 2 (1.1%)          | 2 (1.5%)                          | 0 (0%)                        |
| <i>Streptococcus pneumoniae</i>                                        | 6 (3.4%)          | 3 (2.2%)                          | 3 (7.7%)                      |
| <b>Gram-negative bacteria</b>                                          |                   |                                   |                               |
| <i>Enterobacter cloacae</i>                                            | 1 (0.6%)          | 1 (0.7%)                          | 0 (0%)                        |
| <i>Escherichia coli</i>                                                | 5 (2.9%)          | 3 (2.2%)                          | 2 (5.1%)                      |
| <i>Haemophilus influenzae</i>                                          | 20 (11.4%)        | 16 (11.8%)                        | 4 (10.3%)                     |
| <i>Klebsiella oxytoca</i>                                              | 1 (0.6%)          | 1 (0.7%)                          | 0 (0%)                        |
| <i>Klebsiella pneumoniae</i>                                           | 1 (0.6%)          | 1 (0.7%)                          | 0 (0%)                        |
| <i>Moraxella catarrhalis</i>                                           | 3 (1.7%)          | 2 (1.5%)                          | 1 (2.6%)                      |
| <i>Morganella morganii</i>                                             | 1 (0.6%)          | 0 (0%)                            | 1 (2.6%)                      |
| <i>Neisseria meningitidis</i>                                          | 1 (0.6%)          | 1 (0.7%)                          | 0 (0%)                        |
| <i>Proteus mirabilis</i>                                               | 2 (1.1%)          | 1 (0.7%)                          | 1 (2.6%)                      |
| <i>Pseudomonas spp.</i>                                                | 3 (1.7%)          | 3 (2.2%)                          | 0 (0%)                        |
| <i>Serratia marcescens</i>                                             | 1 (0.6%)          | 1 (0.7%)                          | 0 (0%)                        |
| <i>Stenotrophomonas maltophilia</i>                                    | 4 (2.3%)          | 3 (2.2%)                          | 1 (2.6%)                      |

**Table E3** New bacterial growth after valve implantation. Five patients showed new bacterial growth of 2 bacteria

|                                     | <b>Total<br/>(n = 58)</b> | <b>No granulation tissue<br/>(n = 24)</b> | <b>Granulation tissue<br/>(n = 34)</b> |
|-------------------------------------|---------------------------|-------------------------------------------|----------------------------------------|
| <b>New bacterial growth present</b> | <b>32 (55%)</b>           | <b>9 (38%)</b>                            | <b>23 (68%)</b>                        |
| <i>Haemophilus influenzae</i>       | 14 (24%)                  | 3 (12%)                                   | 11 (32%)                               |
| <i>Staphylococcus aureus</i>        | 10 (17%)                  | 2 (8%)                                    | 8 (24%)                                |
| <i>Pseudomonas spp.</i>             | 4 (7%)                    | 2 (8%)                                    | 2 (6%)                                 |
| <i>Moraxella catarrhalis</i>        | 3 (5%)                    | 0 (0%)                                    | 3 (9%)                                 |
| <i>Stenotrophomonas maltophilia</i> | 3 (5%)                    | 2 (8%)                                    | 1 (3%)                                 |
| <i>Enterobacter cloacae</i>         | 1 (2%)                    | 0 (0%)                                    | 1 (3%)                                 |
| <i>Serratia marcescens</i>          | 1 (2%)                    | 0 (0%)                                    | 1 (3%)                                 |
| <i>Klebsiella oxytoca</i>           | 1 (2%)                    | 1 (4%)                                    | 0 (0%)                                 |
